# Supplementary material for: Temperature-responsive hairy particle-supported proline for direct asymmetric aldol reaction in water
Source: Royal Society of Chemistry journal article supplement (doi:10.1039/c5ra16393e), 2015-01-01
Supplement: c5ra16393e1.pdf [file c5ra16393e1.pdf]

# Temperature-responsive hairy particles-supported proline for direct asymmetric Aldol reaction in water

## Supporting information

1.

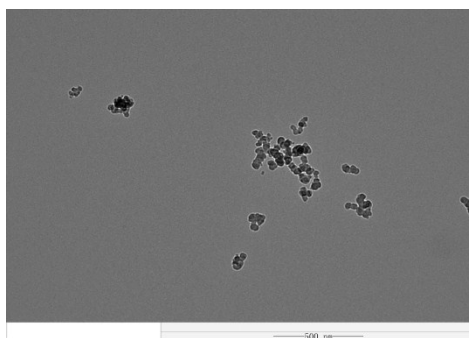

Fig.S1 TEM of 3mg/mL free copolymer (1) solution at room temperature.

2.

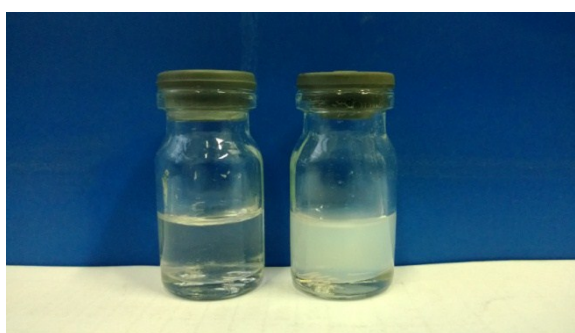

Fig.S2 The image of 3mg/mL free copolymer (1) solution at 0°C and 35°C.

2. Recovery and recycling of the hairy particle (1) supported catalytic system was studied using the same Aldol reaction between 4-nitrobenzaldehyde and cyclohexanone. This adjustment was done to keep the Aldol reaction at 10 mol % catalyst loading throughout the different cycles at 25°C (Table.s1).

**Table s1.** Recycle data for the aldol reaction using the hairy particles (1) supported catalyst at 25°C for 72 h.

| cycle | Recovery rate (%) | % Conversion | Anti/sy n <sup>a</sup> | % ee <sup>b</sup> (Anti) |
|-------|-------------------|--------------|------------------------|--------------------------|
| 1     | 98                | 96           | 10/90                  | 97                       |
| 2     | 99                | 89           | 9/91                   | 96                       |
| 3     | 99                | 90           | 11/89                  | 95                       |
| 4     | 96                | 87           | 14/86                  | 92                       |
| 5     | 97                | 83           | 14/86                  | 92                       |
| 6     | 98                | 82           | 15/85                  | 95                       |

---

|    |    |    |       |    |
|----|----|----|-------|----|
| 7  | 98 | 79 | 14/86 | 93 |
| 8  | 97 | 76 | 16/84 | 91 |
| 9  | 98 | 77 | 14/86 | 92 |
| 10 | 96 | 69 | 20/80 | 90 |
| 11 | 97 | 68 | 29/71 | 92 |

---
